# Supplementary material for: Obstructive Sleep Apnoea Severity Is Negatively Associated with Depressive Symptoms: A Cross-Sectional Survey of Outpatients with Suspected Obstructive Sleep Apnoea in Japan
Source: MDPI journal article supplement (doi:10.3390/ijerph19095007), 2022-04-20
Supplement: s1 [file s1]

**Table S1.** Logistic regression analysis: comparison between patients with AHI/REI <15 and ≥ 15.

|                              | Unadjusted odds ratio<br>(95% CI) | <i>P</i> | Adjusted odds ratio (95%<br>CI) | <i>P</i> |
|------------------------------|-----------------------------------|----------|---------------------------------|----------|
| Age (years)                  | 1.04 (1.03–1.04)                  | <0.001   | 1.04 (1.03–1.05)                | <0.001   |
| Male (%)                     | 2.27 (1.72 – 3.00)                | <0.001   | 2.35 (1.70–3.24)                | <0.001   |
| BMI (kg/m <sup>2</sup> )     | 1.11 (1.08–1.14)                  | <0.001   | 1.14 (1.10–1.18)                | <0.001   |
| Snoring (%)                  | 1.10 (0.86–1.42)                  | 0.452    | 1.11 (0.83–1.48)                | 0.488    |
| ESS                          | 0.95 (0.93–0.98)                  | <0.001   | 1.02 (0.99–1.05)                | 0.221    |
| AIS                          | 0.94 (0.91–0.97)                  | <0.001   | 1.00 (0.96–1.04)                | 0.937    |
| PHQ-9                        | 0.93 (0.90–0.95)                  | <0.001   | 0.96 (0.92 – 1.00)              | 0.042    |
| Hypertension (%)             | 3.01 (2.33–3.90)                  | <0.001   | 1.47 (1.07–2.03)                | 0.017    |
| Diabetes (%)                 | 1.79 (1.30–2.46)                  | <0.001   | 0.89 (0.61–1.22)                | 0.547    |
| Hyperlipidaemia (%)          | 1.53 (1.15–2.02)                  | 0.003    | 0.88 (0.64–1.22)                | 0.451    |
| Cardiovascular diseases (%)  | 1.69 (1.11–2.58)                  | 0.014    | 0.85 (0.53–1.37)                | 0.504    |
| Cerebrovascular diseases (%) | 2.16 (1.19–3.92)                  | 0.012    | 1.36 (0.71–2.60)                | 0.357    |
| Mental disorders (%)         | 0.46 (0.33–0.64)                  | <0.001   | 0.81 (0.53–1.26)                | 0.355    |

BMI, body mass index; PHQ-9, Patient Health Questionnaire-9; AIS, Athens insomnia scale; ESS, Epworth sleepiness scale; AHI, apnoea-hypopnea index; REI, respiratory event index.
